# Supplementary material for: Improving the Aromatic Profiles of Catarratto Wines: Impact of Metschnikowia pulcherrima and Glutathione-Rich Inactivated Yeasts
Source: MDPI journal article supplement (doi:10.3390/antiox12020439), 2023-02-10
Supplement: s1 [file s1]

Supplemental Material

## Improving the aromatic profiles of Catarratto wines: impact of *Metschnikowia pulcherrima* and glutathione-rich inactivated yeasts

Vincenzo Naselli, Rosario Prestianni, Natale Badalamenti, Michele Matraxia, Antonella Maggio\*, Antonio Alfonzo\*, Raimondo Gaglio, Paola Vagnoli, Luca Settanni, Maurizio Bruno, Giancarlo Moschetti and Nicola Francesca

**Table S1.** Chemical parameters determined during alcoholic fermentation time (days): 3, 6, 12, and 18.

**Table S2.** Chemical parameters determined during steel aging time (month): 1, 3 and 5.

**Table S1.** Chemical properties determined during alcoholic fermentation time (days): 3, 6, 12, 18.

| Parameters | Must        | Vinification                     |              |              |              |      |                                  |               |              |               | S.S. |
|------------|-------------|----------------------------------|--------------|--------------|--------------|------|----------------------------------|---------------|--------------|---------------|------|
|            |             | 3 days of alcoholic fermentation |              |              |              | S.S. | 6 days of alcoholic fermentation |               |              |               | S.S. |
|            |             | T1                               | T2           | C1           | C2           |      | T1                               | T2            | C1           | C2            |      |
| pH         | 3.30±0.02   | 3.15±0.01a                       | 3.10±0.01b   | 3.14±0.01a   | 3.06±0.02c   | ***  | 3.17±0.02bc                      | 3.16±0.01c    | 3.21±0.01b   | 3.27±0.02a    | **   |
| TA         | 5.53±0.09   | 5.48±0.06b                       | 5.56±0.00ab  | 5.62±0.04a   | 5.55±0.02ab  | *    | 5.44±0.10a                       | 5.45±0.05a    | 5.50±0.06a   | 5.55±0.07a    | n.s. |
| VA         | 0.00±0.00   | 0.00±0.00a                       | 0.00±0.00a   | 0.00±0.00a   | 0.00±0.00a   | n.s. | 0.00±0.00a                       | 0.00±0.00a    | 0.00±0.00a   | 0.00±0.00a    | n.s. |
| Rs         | 223.99±0.92 | 172.87±1.20a                     | 171.12±1.93a | 146.26±0.24b | 117.20±0.35c | ***  | 112.89±0.36a                     | 83.19±0.72c   | 95.75±0.85b  | 58.79±0.32d   | ***  |
| Glu        | 113.05±0.55 | 79.97±0.19a                      | 78.32±1.16b  | 60.38±0.21c  | 61.93±0.24c  | ***  | 64.35±0.24a                      | 41.62±0.20b   | 44.43±0.15c  | 25.80±0.11d   | ***  |
| Fru        | 110.91±0.36 | 92.90±1.01a                      | 92.80±0.77a  | 85.88±0.03b  | 55.27±0.10c  | ***  | 48.54±0.12b                      | 41.57±0.52c   | 51.32±0.70a  | 32.99±0.21d   | ***  |
| Eth        | 0.01±0.00   | 2.66±0.01c                       | 2.67±0.01c   | 3.93±0.09b   | 5.40±0.08a   | ***  | 5.69±0.08d                       | 7.16±0.12b    | 6.57±0.11c   | 8.44±0.03a    | ***  |
| Gly        | 0.92±0.00   | 2.00±0.03a                       | 2.00±0.01a   | 2.02±0.02a   | 2.01±0.01a   | n.s. | 5.28±0.01a                       | 5.27±0.04a    | 5.06±0.04b   | 5.19±0.07a    | **   |
| MA         | 1.90±0.03   | 1.65±0.02a                       | 1.66±0.02a   | 1.69±0.02a   | 1.66±0.03a   | n.s. | 1.59±0.02a                       | 1.60±0.02a    | 1.60±0.02a   | 1.60±0.03a    | n.s. |
| LA         | 0.00±0.00   | 0.00±0.00a                       | 0.00±0.00a   | 0.00±0.00a   | 0.00±0.00a   | n.s. | 0.00±0.00a                       | 0.00±0.00a    | 0.00±0.00a   | 0.00±0.00a    | n.s. |
| Amm. N     | 85.42±1.01  | 161.57±0.31ab                    | 160.86±0.11a | 159.51±0.77a | 157.27±0.11b | *    | 146.23±0.28c                     | 147.39±0.31bc | 150.96±0.34a | 149.91±1.22ab | *    |
| Alpha-AN   | 33.90±0.39  | 78.16±0.09c                      | 70.21±0.21d  | 80.32±0.32b  | 81.63±0.35a  | ***  | 73.44±0.11c                      | 71.39±0.41d   | 75.97±0.41b  | 78.66±0.16a   | ***  |

→ continued

Result indicate mean value ± standard deviation of three determinations. Data in the same line followed by the same letter are not significantly different according to Tukey's test.

Abbreviations: TA, total titratable acidity (tartaric acid g/l); VA, volatile acidity (acetic acid g/L); RS, reducing sugar (g/L); Glu, glucose (g/L); Fru, fructose (g/L); Eth, ethanol (% v/v); Gly, glycerol (g/L); MA, malic acid (g/L); LA, lactic acid (g/L); Amm. N, ammoniacal nitrogen (mg/L); Alpha-AN, alpha-amino nitrogen (mg/L); n.d., not determined. P value: \*, P < 0.05; \*\*, P < 0.01; \*\*\*, P < 0.001; n.s., not significant.

| Parameters | Vinification                      |              |              |              |      |                                         |             |             |             | S.S. |
|------------|-----------------------------------|--------------|--------------|--------------|------|-----------------------------------------|-------------|-------------|-------------|------|
|            | 12 days of alcoholic fermentation |              |              |              | S.S. | End of alcoholic fermentation (18 days) |             |             |             | S.S. |
|            | T1                                | T2           | C1           | C2           |      | T1                                      | T2          | C1          | C2          |      |
| pH         | 3.24±0.01c                        | 3.21±0.01c   | 3.31±0.00b   | 3.35±0.02a   | ***  | 3.41±0.02b                              | 3.43±0.01b  | 3.47±0.00a  | 3.51±0.01a  | ***  |
| TA         | 5.48±0.03a                        | 5.45±0.07a   | 5.45±0.07a   | 5.48±0.08a   | n.s. | 5.41±0.09a                              | 5.40±0.09a  | 5.42±0.02a  | 5.50±0.08a  | n.s. |
| VA         | 0.00±0.00a                        | 0.00±0.00a   | 0.00±0.00a   | 0.00±0.00a   | n.s. | 0.27±0.00c                              | 0.29±0.00b  | 0.31±0.00a  | 0.31±0.00a  | ***  |
| Rs         | 49.51±0.34a                       | 28.80±0.12c  | 47.80±0.20b  | 27.60±0.30c  | ***  | 3.70±0.04a                              | 2.60±0.05d  | 3.01±0.03c  | 3.24±0.03b  | ***  |
| Glu        | 21.43±0.25a                       | 12.07±0.09b  | 21.09±0.06a  | 10.26±0.12c  | ***  | 1.10±0.01b                              | 1.10±0.01b  | 1.62±0.01a  | 1.11±0.01b  | ***  |
| Fru        | 28.08±0.09a                       | 16.73±0.03d  | 26.71±0.14b  | 17.34±0.18c  | ***  | 2.60±0.03a                              | 1.50±0.04c  | 1.39±0.02d  | 2.13±0.02b  | ***  |
| Eth        | 9.00±0.11b                        | 10.11±0.06a  | 9.03±0.03b   | 10.09±0.08a  | ***  | 11.35±0.15a                             | 11.43±0.13a | 11.36±0.08a | 11.35±0.07a | n.s. |
| Gly        | 5.34±0.02b                        | 5.92±0.09a   | 5.20±0.03b   | 5.22±0.05b   | ***  | 5.58±0.04c                              | 5.31±0.05d  | 5.85±0.08b  | 6.57±0.12a  | ***  |
| MA         | 1.55±0.01                         | 1.58±0.02    | 1.47±0.01    | 1.50±0.01    | ***  | 1.49±0.02a                              | 1.50±0.02a  | 1.36±0.01b  | 1.28±0.02c  | ***  |
| LA         | 0.00±0.00a                        | 0.00±0.00a   | 0.00±0.00a   | 0.00±0.00a   | n.s. | 0.00±0.00a                              | 0.00±0.00a  | 0.00±0.00a  | 0.00±0.00a  | n.s. |
| Amm. N     | 119.88±0.43a                      | 112.28±0.10b | 110.38±0.44c | 109.22±0.37c | ***  | 49.35±0.27a                             | 48.78±0.17a | 45.61±0.21b | 44.41±0.13c | ***  |
| Alpha-AN   | 67.32±0.08c                       | 68.74±0.18b  | 63.84±0.13d  | 69.79±0.15a  | ***  | 55.21±0.08b                             | 53.19±0.06c | 56.81±0.11a | 57.32±0.25a | ***  |

**Table S2.** Chemical parameters determined during steel aging time (month): 1, 3 and 5.

|            | Vinification           |             |             |             |      |             |                        |             |             |      | →continued |
|------------|------------------------|-------------|-------------|-------------|------|-------------|------------------------|-------------|-------------|------|------------|
| Parameters | 1 month of steel aging |             |             |             |      | S.S.        | 3 month of steel aging |             |             |      | S.S.       |
|            | T1                     | T2          | C1          | C2          | T1   |             | T2                     | C1          | C2          |      |            |
| pH         | 3.39±0.01b             | 3.39±0.02b  | 3.41±0.00b  | 3.46±0.01a  | ***  | 3.40±0.01b  | 3.39±0.01b             | 3.43±0.00a  | 3.44±0.02a  | *    |            |
| TA         | 5.40±0.01a             | 5.40±0.08a  | 5.49±0.03a  | 5.45±0.10a  | n.s. | 5.38±0.09a  | 5.39±0.02a             | 5.45±0.04a  | 5.46±0.10a  | n.s. |            |
| VA         | 0.30±0.00c             | 0.30±0.00c  | 0.35±0.01b  | 0.43±0.00a  | ***  | 0.33±0.00b  | 0.34±0.01b             | 0.36±0.00a  | 0.36±0.00a  | *    |            |
| Rs         | 3.00±0.02b             | 2.90±0.01c  | 2.51±0.00d  | 3.36±0.02a  | ***  | 1.25±0.02b  | 1.19±0.02c             | 1.15±0.03c  | 1.47±0.01a  | ***  |            |
| Glu        | 1.62±0.02a             | 0.47±0.00c  | 0.43±0.00d  | 1.47±0.02b  | ***  | 0.31±0.01b  | 0.30±0.00b             | 0.35±0.02a  | 0.21±0.01c  | ***  |            |
| Fru        | 1.38±0.00d             | 2.43±0.01a  | 2.08±0.00b  | 1.89±0.00c  | ***  | 0.94±0.01b  | 0.89±0.02c             | 0.80±0.01b  | 1.26±0.00a  | ***  |            |
| Eth        | 11.35±0.08a            | 11.43±0.13a | 11.36±0.08a | 11.35±0.07a | n.s. | 11.35±0.07a | 11.43±0.10a            | 11.36±0.00a | 11.35±0.09a | n.s. |            |
| Gly        | 5.68±0.08bc            | 5.61±0.07c  | 5.82±0.03b  | 6.48±0.08a  | ***  | 5.67±0.06bc | 5.60±0.09c             | 5.82±0.00b  | 6.49±0.08a  | ***  |            |
| MA         | 1.35±0.02a             | 1.33±0.02a  | 1.32±0.03ab | 1.27±0.01b  | **   | 1.34±0.01a  | 1.32±0.01a             | 1.33±0.01a  | 1.27±0.00b  | *    |            |
| LA         | 0.00±0.00a             | 0.00±0.00a  | 0.00±0.00a  | 0.00±0.00a  | n.s. | 0.00±0.00a  | 0.00±0.00a             | 0.00±0.00a  | 0.00±0.00a  | n.s. |            |
| Amm. N     | n.d.                   | n.d.        | n.d.        | n.d.        | n.d. | n.d.        | n.d.                   | n.d.        | n.d.        | n.d. |            |
| Alpha-AN   | n.d.                   | n.d.        | n.d.        | n.d.        | n.d. | n.d.        | n.d.                   | n.d.        | n.d.        | n.d. |            |

Result indicate mean value ± standard deviation of three determinations. Data in the same line followed by the same letter are not significantly different according to Tukey's test.

Abbreviations: TA, total titratable acidity (tartaric acid g/l); VA, volatile acidity (acetic acid g/L); RS, reducing sugar (g/L); Glu, glucose (g/L); Fru, fructose (g/L); Eth, ethanol (% v/v); Gly, glycerol (g/L); MA, malic acid (g/L); LA, lactic acid (g/L); Amm. N, ammoniacal nitrogen (mg/L); Alpha-AN, alpha-amino nitrogen (mg/L); n.d., not determined. P value: \*, P < 0.05; \*\*, P < 0.01; \*\*\*, P < 0.001; n.s., not significant.

|            | Vinification           |             |             |             |      |
|------------|------------------------|-------------|-------------|-------------|------|
| Parameters | 5 month of steel aging |             |             |             | S.S. |
|            | T1                     | T2          | C1          | C2          |      |
| pH         | 3.38±0.01b             | 3.38±0.02b  | 3.41±0.00a  | 3.43±0.00a  | ***  |
| TA         | 5.35±0.06a             | 5.38±0.05a  | 5.38±0.10a  | 5.42±0.05a  | n.s. |
| VA         | 0.34±0.00c             | 0.36±0.01b  | 0.35±0.00b  | 0.38±0.00a  | ***  |
| Rs         | 0.61±0.00a             | 0.50±0.03b  | 0.28±0.01d  | 0.31±0.01c  | ***  |
| Glu        | 0.20±0.00a             | 0.20±0.01a  | 0.12±0.01b  | 0.15±0.01b  | ***  |
| Fru        | 0.41±0.00a             | 0.30±0.02b  | 0.16±0.00c  | 0.16±0.00c  | ***  |
| Eth        | 11.35±0.17a            | 11.43±0.02a | 11.36±0.06a | 11.35±0.08a | n.s. |
| Gly        | 5.64±0.08bc            | 5.59±0.09c  | 5.80±0.01b  | 6.47±0.06a  | ***  |
| MA         | 1.32±0.02a             | 1.31±0.02ab | 1.30±0.00ab | 1.27±0.02b  | **   |
| LA         | 0.00±0.00a             | 0.00±0.00a  | 0.00±0.00a  | 0.00±0.00a  | n.s. |
| Amm. N     | n.d.                   | n.d.        | n.d.        | n.d.        | n.d. |
| Alpha-AN   | n.d.                   | n.d.        | n.d.        | n.d.        | n.d. |
